1 **A comparative assessment of adult mosquito trapping methods to**  
2 **estimate spatial patterns of abundance and community composition in**  
3 **southern Africa**

4  
5 Gorsich, E.E<sup>\*1,2,3</sup>, Beechler, B<sup>4</sup>, Bodegom, P.M. van<sup>1</sup>, Govender, D.<sup>5</sup>, Guarido, M.M.<sup>6</sup>,  
6 Venter, M.<sup>6</sup>, Schrama, M.<sup>1</sup>

- 7  
8 1. Institute of Environmental Sciences, Leiden University, Leiden, NL.  
9 2. School of Life Sciences, University of Warwick, Coventry, UK.  
10 3. The Zeeman Institute for Systems Biology & Infectious Disease Epidemiology Research,  
11 University of Warwick, Coventry, UK.  
12 4. College of Veterinary Medicine, Oregon State University, Corvallis, OR, United States  
13 5. SANPARKS, Scientific Services, Skukuza, South Africa.  
14 6. Zoonotic Arbo- and Respiratory Virus Program, Centre for Viral Zoonoses, Faculty of  
15 Health Sciences, University of Pretoria, Pretoria, South Africa

16  
17

18 \*Corresponding author address: [erin.gorsich@warwick.ac.uk](mailto:erin.gorsich@warwick.ac.uk)

19

## 20 **Abstract**

21 **Background.** Assessing adult mosquito populations is an important component of disease  
22 surveillance programs and ecosystem health assessments. Inference from adult trapping  
23 datasets involves comparing populations across space and time, but comparisons based on  
24 different trapping methods may be biased if traps have different efficiencies or sample  
25 different subsets of the mosquito community.

26 **Methods.** We compared four widely-used trapping methods for adult mosquito data  
27 collection in Kruger National Park (KNP), South Africa: Centers for Disease Control  
28 miniature light trap (CDC), Biogents Sentinel trap (BG), Biogents gravid *Aedes* trap (GAT),  
29 and a CO<sub>2</sub>-baited net trap. We quantified how trap choice and sampling effort influence  
30 inferences on the regional distribution of mosquito abundance, richness, and community  
31 composition.

32 **Results.** The CDC and net traps together collected 96% (47% and 49% individually) of the  
33 955 female mosquitoes sampled and 100% (85% and 78% individually) of the 40 species  
34 or species complexes identified. The CDC and net trap also identified similar regional  
35 patterns of community composition. However, inference on the regional patterns of  
36 abundance differed between these traps because mosquito abundance in the net trap was  
37 influenced by variation in weather conditions. The BG and GAT traps collected significantly  
38 fewer mosquitoes, limiting regional comparisons of abundance and community  
39 composition.

40 **Conclusion:** This study represents the first systematic assessment of trapping methods in  
41 in natural savanna ecosystems in southern Africa. We recommend the CDC trap or the  
42 combined use of the net and CDC trap for future monitoring and surveillance programs.

43

## 44 **Keywords**

45 Arboviruses, community composition; Kruger National Park; Mosquito; South Africa; Trap

46 Bias; Vector

47

## 48 **Background**

49       Adult mosquito sampling is a key component of mosquito surveillance [1–4], but  
50 trapping success may vary across studies due to differences in trapping methods. Different  
51 traps vary in their ability to catch certain species [5–8]. For example, the dominant species  
52 attracted with light-baited traps may differ from those attracted to traps baited with  
53 carbon dioxide or live hosts [9]. Additionally, sampling conditions such as the number of  
54 nights over which sampling occurs and weather conditions may also influence trapping  
55 success [10], with some species and traps potentially more affected than others. This  
56 variation in trapping outcome may not limit inference on the presence or absence of  
57 common species (e.g. the information used in global risk maps [11,12]). However, it does  
58 limit inference based on comparing patterns of diversity or abundance across space or time  
59 [7]. Given that these comparisons are required to evaluate the ecological or anthropogenic  
60 drivers of mosquito populations and disease risk, choice of trapping methods presents  
61 challenges and opportunities for optimizing sampling efforts.

62       Previous studies have evaluated trapping methods in Europe, North America, and  
63 South America [5–8,13] while studies in southern Africa remain relatively limited. The  
64 mosquito fauna (Diptera: Clucidae) of southern Africa consist of over 216 species, many of

65 which are endemic to the region [14]. Additional studies evaluating trapping methods are  
66 needed to evaluate if traps designed for other locations and species perform equally well in  
67 the rich communities in southern Africa. For example, a recent comparison of four traps in  
68 Germany found that the Biogents Sentinel trap (BG trap) collected the highest number of  
69 individuals in urban and snowmelt forest environments where *Culex* species predominate.  
70 In contrast, the Centers for Disease Control miniature light trap (CDC trap) collected the  
71 most mosquitoes in floodplain environments where *Aedes vexans* predominate, suggesting  
72 that the preferred trapping device may vary by habitat and community composition [7].  
73 Qualitative evaluations in southern Africa suggest different traps likely collect different  
74 subsets of the mosquito community [15]. However, the two studies systematically  
75 evaluating trapping methods in southern Africa focus only on house-based trapping in  
76 residential areas [16,17].

77 An evaluation of trapping methods is also needed to influence the design of future  
78 mosquito surveillance efforts. Such efforts could provide baseline information for public  
79 health interventions by identifying hotspots with a high abundance of vector species  
80 [18,19]. There were more than 26,000 estimated cases of malaria in southern Africa in  
81 2017 (Botswana, Namibia, South Africa, Lesoto, Swaziland) [20]; key malaria vectors  
82 include members of the *Anopheles gambiae* complex (*An. arabiensis*, *An. gambiae*, *An.*  
83 *merus*) [21–23] and the *An. funestus* complex [24]. Mosquito-borne livestock infections are  
84 also a concern, as outbreaks of West Nile virus, Rift Valley fever, Sindbis, and Wesselsbron  
85 occur [25,26]. Key vectors for these viral infections include, *Aedes caballus*, *Ae.*  
86 *circumluteolus*, *Ae. dentatus*, *Ae. juppi*, *Ae. mcintoshi*, *Ae. ochraceus*, *Culex pipiens*, *Cx.*  
87 *quinquefasciatus*, *Cx. univittatus*, and *Cx. theileri* (based on suspected or known prime

88 vectors in Africa, reviewed elsewhere [26]). Previous work has characterized the  
89 distribution [27], ecological drivers [28], and consequences for malaria risk [29] of key  
90 Anopheline species. Understanding the distribution and drivers of non-Anophelinae  
91 mosquito species in southern Africa (but see [15,30]) could facilitate informed  
92 management of a broader range of mosquito-borne disease or the development of vector  
93 control programs that target multiple infections.

94         In this study, we assessed four commonly used trapping methods for adult mosquito  
95 data collection in natural savanna ecosystems. We compared estimates of abundance and  
96 community composition from four traps: Centers for Disease Control miniature light trap  
97 (CDC), Biogents Sentinel trap (BG), Biogents gravid *Aedes* trap (GAT), and a CO<sub>2</sub>-baited net  
98 trap. We also evaluated the importance of trapping method for inferring the regional  
99 distribution of mosquito abundance, mosquito community composition, and the  
100 distribution of key disease vectors.

101

## 102 **Methods**

### 103 *Study location*

104         We sampled twenty sites within five regions of Kruger National Park (KNP), South  
105 Africa (Fig 1). Sampling sites within KNP were chosen to cover the geographic extent of the  
106 park and to capture the variability in rainfall, geology and vegetation types within KNP  
107 (between 22°31' and 25°31' S and 30°45' and 32°00' E) [31]. This region experiences  
108 summer rainfall between November and April, and we selected our sampling to occur from  
109 March to April 2017, when mosquito populations are generally high. We sampled 5 out of  
110 the 22 management regions within the park: Malelane, Skukuza, Satara, Shingwedzi, and

111 Punda Maria. Within each region, we sampled at four sites, which were selected based on  
112 multiple criteria (Fig 1). The primary selection criterion was to sample from water bodies  
113 that represented diverse types of wetlands (temporary ponds, permanent ponds, rivers).  
114 Additional criteria stipulated that the water bodies were at least 2 km away from one  
115 another to avoid sampling mosquitoes from adjacent water bodies and within 25 km from  
116 one another for sampling logistics. These distances are justified based on mean mosquito  
117 dispersal rates, which range from 35m to 1.4 km depending on the species and habitat [32–  
118 35]. Although dispersal farther than 2 km is possible, it is uncommon [36] and we do not  
119 expect it to influence our results because only one pair of sites in Shingwedzi was located  
120 within 1km of each other due limited surface water availability in the area.

#### 121 *Trapping and identification*

122 We trapped at each site within a region for four consecutive nights and moved  
123 sequentially between regions each week in random order (Skukuza: 20-March to 23-  
124 March-2017; Malelane 27-March to 30-March-2017; Satara 3-April to 6-April-2017;  
125 Shingwedzi 17-April to 20-April; Punda Maria 24-April to 27-April-2017). The four traps  
126 we used were the Centers for Disease Control miniature light trap with an incandescent  
127 light (Bioquip Inc, USA), a Biogents Sentinel trap (Biogents AG, Germany), the Biogents  
128 gravid *Aedes* trap (Biogents AG, Germany), and the net trap. Although the net trap is not  
129 commercially available, it is easily and inexpensively made from netting and poles (see  
130 [15,30]). For consistency in sampling and to minimize any bias due to the traps' location,  
131 we set up the traps at a similar distance away from the water body (15-25m) and  
132 consistently rotated their positions around the water body at each site. The four positions  
133 were defined based on their cardinal direction around the water body. Position 1 was set

134 directly east of the water body and positions 2-4 were set approximately 30-50m away  
135 from each other moving northward around the water body. For the first two nights of  
136 trapping, the BG trap was set in position 1, the GAT trap in position 2, the net trap in  
137 position three, and the CDC trap in position 4. For the second two nights of trapping, the  
138 traps were rotated one position, such that the CDC trap was moved to position 1.

139 Our trap-use protocol was based on preliminary trapping work and expertise from  
140 mosquito surveillance in southern Africa [15,30]. Specifically, we equipped the CDC trap,  
141 BG trap, and net trap with a closed container containing 200-400g of dry ice. To ensure the  
142 dry ice would last overnight, we reduced sublimation by wrapping the dry ice in multiple  
143 layers of newspaper and ensuring the container was closed except for 2 small holes. We  
144 placed the dry ice containers inside the BG traps, at the center of the net trap, and hanging  
145 with the CDC trap according to the manufacturer's instructions. In addition to the spatial  
146 locations defined above, we hung the CDC light trap on a branch so it was approximately  
147 1m from the ground, and we placed the BG and GAT traps on the ground. We ensured the  
148 traps were placed close to the vegetation, but not directly under it, which has been shown  
149 to improve trapping success [10]. If available, we placed the net trap in slight shade and  
150 pulled the netting down to leave an approximately 10cm opening from the ground. Our  
151 trapping schedule required traps to be set up in the field before dusk (4-6pm) and emptied  
152 again at dawn (6-7am). The timing of this sample collection was used because the net trap  
153 requires clearing at dawn, as mosquitoes may leave the trap after sunrise. Due to rainfall,  
154 we excluded one trapping night at all sites in Satara and Punda Maria from all analyses.

155 During the study, five sampling events (nights at one site) with the BG trap, two  
156 sampling events with the CDC trap, and one sampling event with the net trap were lost due

157 to animal interference that damaged the trap. An additional 11 nights of BG trap sampling  
158 were lost due to other logistical reasons, primarily permanent damage by hyenas, which we  
159 hypothesize is due to the Octenol bait. Our statistical analyses account for trap loss by  
160 excluding data or comparisons from damaged traps.

161 Directly after emptying the traps, we stored the mosquitoes on dry ice in the field  
162 and at -20°C until identification. For identification of Anophelinae mosquitoes, we used  
163 identification literature from Gilles & Coutzee [37]. All Anophelinae were identified to  
164 species except for members of *An. funestus* complex and the *An. gambiae* complex (referred  
165 to here as *An. gambiae s.l.*), which require molecular methods for identification [38]. For  
166 identification of Culicinae, we used the key by Peter Jupp [14]. Species were identified  
167 independently in duplicate by coauthors. Because species identification in the *Aedes vexans*  
168 complex (*Ae. vexans*, *Ae. hirsutus*, *Ae. fowleri*, *Ae. durbanensis*, *Ae. natronius*), and the *Aedes*  
169 *dentatus* complex (*Ae. dentatus*, *Ae. subdentatus*, *Ae. pachyurus*, *Ae. bevisi*, *Ae. cumminsii*)  
170 were inconsistent at the species level, we aggregated them to the species complex level.

#### 171 *Abiotic measurements*

172 Temperature and rainfall within KNP follow a north-south gradient, with the highest  
173 values in the south-west [39]. Temperature, relative humidity, and wind speed may  
174 influence trapping success; they were monitored using a Kestrel 3000 handheld weather  
175 meter (NK Inc., Boothwyn, PA, USA). We calculated the median temperature, relative  
176 humidity, and wind speed across sites within a region for each morning at the time of  
177 collection (Table S1). All environmental variables were standardized for analysis, by  
178 centering and dividing by one standard deviation.

179 *Assessing how the number of traps and trapping nights influences mosquito richness*



180 We assessed how observed species richness (the total number of unique species)  
181 saturates with sampling effort. We aggregated the data successively over 1, 2, 3, or 4 nights  
182 and calculated the cumulative proportion of species identified with an increasing  
183 proportion of nights. We also evaluated each trap's ability to estimate richness by  
184 comparing richness estimated in pairs of trap types at each site aggregated across all  
185 sampling nights using a Wilcoxon signed-rank test and a Bonferroni correction for multiple  
186 comparisons. This analysis accounts for trap losses by excluding comparisons from  
187 damaged traps.

188 *Assessing whether trap type influences estimates of mosquito abundance and inference on the*  
189 *regional patterns of abundance*

190 To test for differences in abundance, we compared the number of mosquitoes  
191 collected per night between pairs of traps. First, we quantified the relationship between  
192 trap type and abundance with a Wilcoxon signed-rank test and a Bonferroni correction for  
193 comparisons among the 4 traps. Then, we quantified the influence of trap type for  
194 inferences on the regional patterns of abundance using linear regressions with Poisson  
195 errors and a log-link function. The regression analyses assessed the relationship between a  
196 trap's nightly mosquito counts with region of the park (*region*) and weather conditions  
197 (wind speed, temperature, relative humidity (*RH*)). These assumptions result in the  
198 following full model,

$$199 \log(\mu_i) = \alpha_{j[i]} + \beta_{1,k} region_k + \beta_2 windspeed_i + \beta_3 temperature_i + \beta_4 RH_i + \varepsilon_i \quad (1)$$

200 where  $\mu_i$  is the expected number of mosquitoes captured at evening  $i$  in the trap,  $\varepsilon_i$  is the  
201 Poisson distributed random error, and  $\alpha_{j[i]}$  is the site-specific intercept.

202           We fit the regression model separately to data from the CDC trap, the net trap, the  
203 BG trap, and data from aggregating abundance across all traps at a site. Because no  
204 individuals were collected in the GAT trap on most nights, we did not fit the model to data  
205 from the GAT trap alone. For each dataset, we conducted model selection using backward  
206 selection based on AICc and select the model with the lowest AICc value. From the selected  
207 model, we evaluate  $\beta_{1,k}$  to determine how the average counts of mosquitoes in region  $k$   
208 differed from counts in Malelane, and we evaluate  $\beta_2, \beta_3, \beta_4$  to determine how the average  
209 counts of mosquitoes vary with wind speed, temperature, and relative humidity,  
210 respectively. If the relative values of  $\beta_{1,k}$  are consistent among traps (e.g.  $\beta_{1,1} > \beta_{1,2} > \beta_{1,3}$ )  
211 for models fit to data from different traps, then we conclude that trap choice does not  
212 influence spatial comparisons among regions. We fit all regression models in R [40] using  
213 the lme4 package [41].

214 *Assessing whether trap type influences estimates of mosquito community composition and*  
215 *inference on the regional patterns of mosquito communities*

216           To assess if different traps provide different estimates of community composition,  
217 we first evaluated if certain species were particularly attracted to one trap over the other.  
218 We assessed species-specific trap bias by calculating the difference in the number of  
219 individuals for each species sampled between each pair of traps collected at a site over all  
220 nights of trapping. Because traps were paired at each site, we tested for differences  
221 between the traps using a Wilcoxon signed-rank test and a Bonferroni correction for  
222 multiple comparisons. We only compared the species-specific trap bias of common species,  
223 defined as being observed in the dataset more than three times. Because 23 common

224 species were compared ( $k = 23$ ), significant differences between traps occur when p-values  
225 are less than  $p = 0.05/23$ . We assessed trap bias for rare species visually.

226 To test for differences in community composition among traps, we used a  
227 nonparametric analysis of similarities analysis (ANOSIM), visualized potential differences  
228 with nonmetric multidimensional scaling (NMDS), and quantified the influence of trap type  
229 for inferences on the regional patterns of community composition with hierarchical  
230 clustering. For all analyses, we calculated Bray-Curtis dissimilarity matrices based on the  
231 trap-specific (BG, CDC, net) abundances of all taxa within a site aggregated across sampling  
232 nights. The ANOSIM analysis is a non-parametric test for differences in mosquito  
233 communities among traps that compares the ranks of Bray-Curtis dissimilarity measures  
234 from samples collected from the same vs. different traps [42]. To visualize this, we created  
235 an ordination of traps and sites in mosquito community space for each region of the park.  
236 Before all ordinations, we applied a Wisconsin transformation followed by a square root  
237 transformation to the species matrices, which standardizes by species maxima and reduces  
238 the influence of highly abundant taxa, respectively [43]. The ordinations converged on a  
239 stable two-dimensional solution, based on stress values. We conducted all community  
240 analyses in R using the vegan package [44].

#### 241 *Describing regional patterns of disease vectors*

242 We additionally describe how known prime vectors for West Nile virus (*Cx. pipiens*,  
243 *Cx. quinquefasciatus*, *Cx. theileri*, *Cx. univittatus*), Rift Valley fever (*Ae. dentatus*, *Ae.*  
244 *mcintoshi*, *Ae. ochraceus*), Sindbis (*Cx. univittatus*), and Wesselsbron (none found) are  
245 distributed across regions [21,26]. Additional known prime vectors for these infections  
246 were not found in the study (*Ae. caballus*, *Ae. circumluteolus*, *Ae. juppi*). Chikungunya and

247 dengue fever outbreaks are less common in South Africa [14], but we describe the  
248 distribution of their vector, *Ae. aegypti* [21] because additional known prime vectors in  
249 Africa were not found (*Ae. africanus*, *Ae. albopictus*, *Ae. cordellieri*, *Ae. furcifer*, *Ae.*  
250 *luteocephalus*, *Ae. neoafricanus*, *Ae. taylori*). We focus on the known prime vectors for a  
251 conservative description, but additional mosquito species are considered suspected vectors  
252 (reviewed in [26]). We use the numbers of *Cx. pipiens* complex to approximate the numbers  
253 of *Cx. pipiens* and *Cx. quinquefasciatus*; *Cx. univittatus* complex for *Cx. univittatus*; *Ae.*  
254 *dentatus* complex for *Ae. dentatus*. Although this assumption may hide epidemiologically  
255 important variation, it is a valid approximation for these infections because multiple  
256 members of the complex are known or suspected vectors. However, we do not plot the  
257 distribution of malaria vectors because the most abundant species of *An. gambiae s.l.* in  
258 KNP, *An. quadriannulatus*, is not a malaria vector [15].

259

## 260 **Results**

261 We collected 955 female mosquitoes, 946 (99.1%) of which were identified to the  
262 level of species or species complex (Table S2). The most common species included  
263 members of the *Culex univittatus* complex, *Aedes vexans* complex, and *Culex pipiens*  
264 complex. We also collected over 50 *Anopheles gambiae s.l.*, *Anopheles pretoriensis*, and  
265 *Culex theileri* females.

266 *Mosquito communities can be characterized with the net and CDC traps after multiple*  
267 *trapping nights*

268 Based on all traps together, mosquito community richness was sensitive to the  
269 number of sampling nights (Fig 2; Fig S1). Taken across all sites in Malelane, 89% (24/27)

270 of the total number of unique species identified after four trapping nights were collected by  
271 night 2 and 96% (26/27) were collected by night 3. In Shingwedzi, 79% (19/24) of the  
272 species were collected by night 2 and 96% (23/24) by night 3. In Punda Maria, 53% (8/15)  
273 of the species were collected by night 2 and 87% (13/15) by night 3. We note that these  
274 percentages overestimate the percent of richness captured because species accumulation  
275 curves suggest more than four nights of sampling are required to estimate total species  
276 richness (Fig 2). The CDC and net trap together sampled all of the mosquito species  
277 captured (range across regions, 93-100%), while the BG and GAT trap captured far fewer  
278 species (Fig 2). Estimates of richness did not significantly differ between samples from the  
279 net or CDC trap (Wilcoxon signed-rank test, p-value = 0.940), but estimates based on the  
280 BG trap were lower than both the net and CDC trap (p-values <0.001).

281 *Daily mosquito abundance estimates were comparable between the net and CDC traps but not*  
282 *the BG and GAT trap*

283 Most female individuals were collected in the CDC or the net trap, while the BG and  
284 GAT trap captured far fewer individuals (Fig 3a). Together, the CDC and net trap sampled  
285 96% of the individuals collected (range across regions, 94-99%). Estimates of mosquito  
286 abundance did not significantly differ based on samples from the net or CDC trap (Wilcoxon  
287 signed-rank test, p-value = 0.095), but estimates based on the BG trap were lower than  
288 both the net and CDC trap (p-values <0.001; Fig 3b). Regression analyses showed that trap  
289 choice influences comparisons between regions. All traps identified similar trends, with the  
290 highest numbers captured in Malelane and the lowest numbers captured in Punda Maria  
291 (Fig3c; Table S3). However, this spatial pattern was only significantly different for models  
292 fit to the CDC data ( $\beta_{1,1}$  for Punda Maria vs. Malelane = -1.88, p-value = 0.002). Unlike the

293 CDC trap, the BG and net trap were influenced by weather conditions (Table S3). The BG  
294 and net trap collected higher numbers in warm, low wind conditions (Fig 3c). The net trap  
295 also collected higher numbers in low relative humidity conditions. Results based on counts  
296 aggregated from multiple traps were similar to results based on counts from either the CDC  
297 or net trap alone (Fig 3c; Table S3).

298 *Mosquito community composition was consistent between the net and CDC trap but not the*  
299 *BG trap*

300 Community composition was similar between the net and CDC trap, but not for the  
301 BG trap (ANOSIM overall  $R = 0.126$ ,  $p$ -value = 0.04; pairwise  $p$ -values: net vs. CDC  $p$ -value =  
302 0.894; net vs. BG  $p$ -value = 0.023; CDC vs. BG  $p$ -value = 0.009). NMDS ordinations of traps  
303 in species space reflect this relationship although some variation across regions of the park  
304 does exist (Fig S2; Table S4). However, we did not find evidence for species-specific bias  
305 between any of the traps, suggesting that differences in community composition in the BG  
306 trap are driven by the relatively lower abundance collected in the trap (Fig 4; Fig S3). For  
307 common species collected in the net vs. CDC trap, the number of individuals collected was  
308 not significantly different between the traps (Fig 4a; No hypothesis tests for individual  
309 species were significant). Rare species also did not show trap biases and include *Ae.*  
310 *aerarius*, *Ae. metallicus*, *Ae. unidentatus*, *An. maculipalpis*, *An. ziemanni*, *Cx. antennatus*, *Cx.*  
311 *bitaenorrhynchus*, *Cx. nebulosus*, *Lutzia tigripes*, *Mansonia africana*, and *Uranotaenia balfouri*  
312 (Fig S4). For comparisons with the BG trap, the net and CDC traps both collected higher  
313 numbers of individuals, but there were no species or genus shifts driving this pattern (Fig  
314 4b-c; Fig S3).

315           Although trap choice influences estimates of community composition (e.g.  
316 community richness, ordinations), hierarchical cluster analysis suggests that may be less  
317 important for comparisons between regions (Fig 5; Fig S5). Regional patterns in mosquito  
318 communities were consistent across trap types, with samples from Malelane and Satara  
319 being more similar than samples from Shingwedzi. Mosquito communities estimated from  
320 the CDC and net trap were clustered by region (Fig S5), indicating that communities within  
321 a region were more closely related to each other than communities between regions  
322 regardless of the net or CDC trap. In contrast, samples from the BG trap were clustered  
323 separately from the samples from the net and CDC trap due to the overall lower  
324 abundances in the BG trap (Fig 5). We, therefore, describe the regional patterns of disease  
325 vectors based on data from all traps together (Fig 6). Rift Valley fever vectors were most  
326 common in Satara while West Nile virus and Sindbis vectors were more common in  
327 Shingwedzi and Punda Maria. We did not find known vectors for Wesselsbron (*Ae. caballus*,  
328 *Ae. circumluteolus*) within the park.

329

## 330 **Discussion**

331           Mosquito trapping is used for disease surveillance, biodiversity surveys, and  
332 nuisance-reduction. In light of these multiple, non-exclusive aims, this study compared  
333 traps based on four potential goals: collecting large numbers of mosquitoes; estimating  
334 mosquito community composition, including vector or rare species; characterizing the  
335 spatial patterns of abundance; and characterizing the spatial patterns of community  
336 composition. We expected trade-offs among these aims, for example with traps specializing  
337 on one vector to be less successful in estimating community richness (and vice versa, e.g.

338 [45]). In contrast to this expectation, our results indicated that the net and CDC trap  
339 consistently performed best across multiple outcomes.

340 The CDC and net trap collected higher abundances and more unique species  
341 compared to the BG and GAT traps, which collected no mosquitoes on most nights. This  
342 result is different from trap comparison studies in Europe [7], the U.S. (BG: [13], GAT: [46]),  
343 and South America (BG: [47], GAT: [48]), where both the BG and GAT traps have been  
344 shown to perform well. One reason for their relatively low success within KNP could be the  
345 diversity and types of species present within the park. The GAT trap has been designed to  
346 capture container-breeding species, such as *Ae. aegypti* [48], and the BG trap performs well  
347 in sampling *Ae. aegypti*, *Ae. albopictus*, and *Cx. pipiens* [7,49]. Although *Ae. aegypti* was  
348 present in our study and previous studies [15], they were relatively rare (Table S1). The BG  
349 trap's sampling efficiency for the two most-common species complexes in our dataset –  
350 members of the *Ae. vexans* complex and *Cx. univittatus* complex – is either low [7] for the *Ae.*  
351 *vexans* complex or previously unknown for the *Cx. univittatus* complex. An alternative  
352 reason for the low success of the BG trap could be that it is negatively influenced by the  
353 presence of alternative refugia and oviposition sites [50]. Habitat heterogeneity is likely to  
354 be higher within KNP compared to other, primarily urban or suburban environments  
355 where mosquito traps have been evaluated ([13, 46, 47], but see [7]). Additional  
356 comparisons in urban environments in southern Africa are needed to distinguish these two  
357 hypotheses.

358 By providing a detailed comparison between the net and CDC traps, our results also  
359 suggest that estimates of community richness and diversity are comparable between them.  
360 The CDC and net traps differed, however, in their inference about which regions had the



361 highest mosquito abundance because the net trap was more sensitive to weather  
362 conditions. This difference is likely to be important for studies comparing vector  
363 abundance across space or time and suggests that vector surveillance or control programs  
364 should use caution in comparing patterns of abundance between studies that did not use  
365 the same trap. However, the consistent patterns of community composition in the net and  
366 CDC trap suggest that comparisons of vector communities between studies using the net  
367 and CDC trap are possible.

368         The choice between the CDC and net trap should also consider other features of the  
369 traps, such as ease of use and specimen quality. For morphological identification, the net  
370 trap has the advantage that mosquito specimens can be collected with minimal damage,  
371 which makes them easier to identify [14]. Therefore, studies requiring precise species  
372 identification such as biodiversity assessments may prefer the net trap. However, for  
373 sampling large numbers of sites or sites in remote locations, the CDC trap has an advantage  
374 because the timing of when traps need to be cleared is more flexible compared to the net  
375 trap, which has to be cleared at sunrise. These practical considerations may mean that the  
376 CDC trap is better suited for large, comparative studies.

377

## 378 **Conclusions**

379         After assessing four different mosquito trapping methods in a natural savanna  
380 ecosystem, we recommend the net trap, the CDC trap, or their combined use for outdoor  
381 mosquito surveillance in southern Africa. These traps performed well based on four  
382 evaluation criteria: collecting large numbers of mosquitoes; estimating mosquito  
383 community composition, including vector or rare species; characterizing the spatial

384 patterns of abundance; and characterizing the spatial patterns of community composition.

385 This suggests they are appropriate for both biodiversity surveys and vector surveillance. As

386 such, this study provides a valuable proof-of-principle for characterizing the spatial

387 patterns of non-vectors as well as vectors for multiple diseases.

388

## 389 **Declarations**

390 *Ethics approval:* Not applicable

391 *Consent for publication:* Not applicable

392 *Availability of data and materials:* The dataset supporting the conclusions of this article are

393 available in the dryad digital repository and the free online mosquito databases, VectorMap

394 (<http://vectormap.si.edu>).

395 *Competing Interests:* The authors declare that they have no competing interests.

396 *Funding:* This study was supported by the Gratama Fund from University of Leiden (grant

397 number 2016.08) the Uyttenboogaart-Eliassen foundation for comparative entomology to

398 EEG (SUB.2016.12.08), and the RCN-IDEAS travel grant to EEG.

399 *Author contribution statement:* EG, BB, MS conceived and designed the analysis; EG, BB, DG,

400 MS collected the data; EG, MG, MS conducted identifications; EG, PB, MS performed analyses;

401 all authors wrote the paper.

402 *Acknowledgements:* We thank South African National Parks (SANParks) for their support in

403 conducting this study in Kruger and providing us with mosquito specimens to help with

404 identification. We thank Purvance H. Shikwambana and a great field team: Vicky Beckers,

405 Nina Haver, Louie Krol, Skhumbuza Mdletshe, Karabo Moloji, Nondumiso Myataza, and Gijs

406 van Nes. We thank Dr. Alan Kemp, Professor. A. Paulo Gouveia de Almeida, and Dr. Anthony

407 Cornel for their assistance with identifications. This study was supported by the Gratama  
408 Fund from University of Leiden (grant number 2016.08) the Uyttenboogaart-Eliassen  
409 foundation for comparative entomology to EEG (SUB.2016.12.08), and the RCN-IDEAS  
410 travel grant to EEG.

411

## 412 **References**

413 1. Meyer SDB, Ritchie SA, Laurance SGW. Mosquito communities and disease risk influenced  
414 by land use change and seasonality in the Australian tropics. *Parasit Vectors*. 2016;9:387.

415 2. Janko MM, Irish SR, Reich BJ, Peterson M, Doctor SM, Mwandagalirwa MK, et al. The links  
416 between agriculture, *Anopheles* mosquitoes, and malaria risk in children younger than 5 years in  
417 the Democratic Republic of the Congo: a population-based, cross-sectional, spatial study. *Lancet*  
418 *Planet Health*. 2018;2:e74–82.

419 3. Diuk-Wasser MA, Brown HE, Andreadis TG, Fish D. Modeling the spatial distribution of  
420 mosquito vectors for West Nile virus in Connecticut, USA. *Vector Borne Zoonotic Dis*.  
421 2006;6:283–95.

422 4. Galardo AKR, Zimmerman RH, Lounibos LP, Young LJ, Galardo CD, Arruda M, et al.  
423 Seasonal abundance of anopheline mosquitoes and their association with rainfall and malaria  
424 along the Matapí River, Amapá, Brazil. *Med Vet Entomol*. 2009;23:335–49.

425 5. Dennett JA, Vessey NY, Parsons RE. A comparison of seven traps used for collection of  
426 *Aedes albopictus* and *Aedes aegypti* originating from a large tire repository in Harris County  
427 (Houston), Texas. *J Am Mosq Control Assoc*. 2004;20:342–9.

- 428 6. Hoel DF, Kline DL, Allan SA. Evaluation of six mosquito traps for collection of *Aedes*  
429 *albopictus* and associated mosquito species in a suburban in north central Florida. J Am Mosq  
430 Control Assoc. 2009;25:47–57.
- 431 7. Lühken R, Pfitzner WP, Börstler J, Garms R, Huber K, Schork N, et al. Field evaluation of  
432 four widely used mosquito traps in Central Europe. Parasit Vectors. 2014;7:268.
- 433 8. L’Ambert G, Ferre J-B, Schaffner F, Fontenille D. Comparison of different trapping methods  
434 for surveillance of mosquito vectors of West Nile virus in Rhone Delta, France. J Vector Ecol.  
435 2012;37:269–75.
- 436 9. Jupp PG, McIntosh BM, Nevill EM. A survey of the mosquito and culicoides faunas at two  
437 localities in the Karoo region of South Africa with some observations on bionomics.  
438 Onderstepoort J Vet Res. 1980;47:1–6.
- 439 10. Crepeau TN, Healy SP, Bartlett-Healy K, Unlu I, Farajollahi A, Fonseca DM. Effects of  
440 Biogents Sentinel Trap field placement on capture rates of adult Asian tiger mosquitoes, *Aedes*  
441 *albopictus*. PLoS One. 2013;8:e60524.
- 442 11. Kraemer MUG, Sinka ME, Duda KA, Mylne AQN, Shearer FM, Barker CM, et al. The  
443 global distribution of the arbovirus vectors *Aedes aegypti* and *Ae. albopictus*. eLife.  
444 2015;4:e08347.
- 445 12. Hay SI, Sinka ME, Okara RM, Kabaria CW, Mbithi PM, Tago CC, et al. Developing Global  
446 Maps of the Dominant *Anopheles* Vectors of Human Malaria. PLoS Med. 2010;7:e1000209.

- 447 13. Farajollahi A, Kesavaraju B, Price DC, Williams GM, Healy SP, Gaugler R, et al. Field  
448 Efficacy of BG-Sentinel and Industry-Standard Traps for *Aedes albopictus* (Diptera: Culicidae)  
449 and West Nile Virus Surveillance. *J Med Entomol.* 2009;46:919–25.
- 450 14. Jupp PG. Mosquitoes of southern Africa. P.O.Box 178 Hartebeespoort 0216, South Africa:  
451 Ekogilde Publishers; 1996.
- 452 15. Cornel AJ, Lee Y, Almeida APG, Johnson T, Mouatcho J, Venter M, et al. Mosquito  
453 community composition in South Africa and some neighboring countries. *Parasit Vectors.*  
454 2018;11:331.
- 455 16. Sikaala CH, Killeen GF, Chanda J, Chinula D, Miller JM, Russell TL, et al. Evaluation of  
456 alternative mosquito sampling methods for malaria vectors in Lowland South - East Zambia.  
457 *Parasit Vectors.* 2013;6:91.
- 458 17. Govella NJ, Chaki PP, Mpangile JM, Killeen GF. Monitoring mosquitoes in urban Dar es  
459 Salaam: Evaluation of resting boxes, window exit traps, CDC light traps, Ifakara tent traps and  
460 human landing catches. *Parasit Vectors.* 2011;4:40.
- 461 18. Maharaj R, Moonasar D, Baltazar C, Kunene S, Morris N. Sustaining control: lessons from  
462 the Lubombo spatial development initiative in southern Africa. *Malar J.* 2016;15:409.
- 463 19. Sharp BL, Kleinschmidt I, Streat E, Maharaj R, Barnes KI, Durrheim DN, et al. Seven years  
464 of regional malaria control collaboration Mozambique, South Africa, and Swaziland. *Am J Trop*  
465 *Med Hyg.* 2007;76:42–7.

- 466 20. World Health Organization. Global Health Observatory (GHO) data. Malaria country  
467 profiles. [Internet]. Available from: <https://www.who.int/malaria/publications/country->  
468 [profiles/profile\\_zaf\\_en.pdf?ua=1](https://www.who.int/malaria/publications/country-profiles/profile_zaf_en.pdf?ua=1)
- 469 21. Burke A, Dandolo L, Munhenga G, Dahan-Moss Y, Mbokazi F, Ngxongo S, et al. A new  
470 malaria vector mosquito in South Africa. *Sci Rep.* 2017;7:43779.
- 471 22. Coetzee M, Craig M, le Sueur D. Distribution of African malaria mosquitoes belonging to  
472 the *Anopheles gambiae* complex. *Parasitol Today.* 2000;16:74–7.
- 473 23. Coetzee M, Hunt RH, Wilkerson R, Torre AD, Coulibaly MB, Besansky NJ. *Anopheles*  
474 *coluzzii* and *Anopheles amharicus*, new members of the *Anopheles gambiae* complex. *Zootaxa.*  
475 2013;3619:246–74.
- 476 24. Coetzee M, Fontenille D. Advances in the study of *Anopheles funestus*, a major vector of  
477 malaria in Africa. *Insect Biochem Mol Biol.* 2004;34:599–605.
- 478 25. Jupp P. Mosquitoes as vectors of human disease in South Africa. *South Afr Fam Pract.*  
479 2005;47:68–72.
- 480 26. Braack L, Gouveia de Almeida AP, Cornel AJ, Swanepoel R, de Jager C. Mosquito-borne  
481 arboviruses of African origin: review of key viruses and vectors. *Parasit Vectors.* 2018;11:29.
- 482 27. Coetzee M, Hunt R, Braack L, Davidson G. Distribution of mosquitos belonging to the  
483 *Anopheles gambiae* complex, including malaria vectors, south of latitude 15-degrees-S. *South*  
484 *Afr J Sci.* 1993;89:227–31.

- 485 28. Charlwood JD. Some like it hot: a differential response to changing temperatures by the  
486 malaria vectors *Anopheles funestus* and *An. gambiae* s.l. Peerj. 2017;5:e3099.
- 487 29. Kabaghe AN, Chipeta MG, Gowelo S, Mburu M, Truwah Z, McCann RS, et al. Fine-scale  
488 spatial and temporal variation of clinical malaria incidence and associated factors in children in  
489 rural Malawi: a longitudinal study. Parasit Vectors. 2018;11:129.
- 490 30. Hammami P, Tran A, Kemp A, Tshikae P, Kgori P, Chevalier V, et al. Rift Valley fever  
491 vector diversity and impact of meteorological and environmental factors on *Culex pipiens*  
492 dynamics in the Okavango Delta, Botswana. Parasit Vectors. 2016;9:434.
- 493 31. Pickett STA, Cadenasso ML, Benning TL. Biotic and abiotic variability as key determinants  
494 of savanna heterogeneity at multiple spatiotemporal scales. The Kruger Experience: Ecology and  
495 Management of Savanna Heterogeneity. Washington: Island Press; 2003. p. 22–40.
- 496 32. Ciota AT, Maticchiero AC, Kilpatrick AM, Kramer LD. The effect of temperature on life  
497 history traits of *Culex* mosquitoes. J Med Entomol. 2014;51:55–62.
- 498 33. Hamer GL, Anderson TK, Donovan DJ, Brawn JD, Krebs BL, Gardner AM, et al. Dispersal  
499 of adult *Culex* mosquitoes in an urban West Nile virus hotspot: A mark-capture study  
500 incorporating stable isotope enrichment of natural larval habitats. PLoS Negl Trop Dis.  
501 2014;8:e2768.
- 502 34. Muir LE, Kay BH. *Aedes aegypti* survival and dispersal estimated by mark-release-recapture  
503 in northern Australia. Am J Trop Med Hyg. 1998;58:277–82.

- 504 35. Medeiros MCI, Boothe EC, Roark EB, Hamer GL. Dispersal of male and female *Culex*  
505 *quinquefasciatus* and *Aedes albopictus* mosquitoes using stable isotope enrichment. PLoS Negl  
506 Trop Dis. 2017;11:e0005347.
- 507 36. Verdonschot PFM, Besse-Lototskaya AA. Flight distance of mosquitoes (Culicidae): A  
508 metadata analysis to support the management of barrier zones around rewetted and newly  
509 constructed wetlands. Limnologica. 2014;45:69–79.
- 510 37. Gillies T, Coetzee M. A supplement of the Anophelinae of Africa south of the Sahara  
511 (Afrotropical Region): Publications of the South African Institute for Medical Research.  
512 1987;55:1–143.
- 513 38. Koekemoer LL, Kamau L, Hunt RH, Coetzee M. A cocktail polymerase chain reaction assay  
514 to identify members of the *Anopheles funestus* (Diptera: Culicidae) group. Am J Trop Med Hyg.  
515 2002;66:804–11.
- 516 39. Venter FJ, Scholes RJ, Eckhardt HC. The abiotic template and its associated vegetation  
517 pattern. The Kruger Experience: ecology and management of savanna heterogeneity.  
518 Washington: Island Press; 2003. p. 83–129.
- 519 40. R Development Core Team. R: A language and environment for statistical computing.  
520 Vienna, Austria: R Foundation for Statistical Computing; 2014.
- 521 41. Bates D, Maechler M, Bolker B, Walker S. Fitting linear mixed-effects models using lme4. J  
522 Stat Softw. 2015;67:1–48.



- 523 42. Anderson MJ, Walsh DCI. PERMANOVA, ANOSIM, and the Mantel test in the face of  
524 heterogeneous dispersions: What null hypothesis are you testing? *Ecol Monogr.* 2013;83:557–74.
- 525 43. Legendre P, Gallagher ED. Ecologically meaningful transformations for ordination of species  
526 data. *Oecologia.* 2001;129:271–80.
- 527 44. Oksanen J, Blanchet FG, Friendly M, Kindt R, Legendre P, McGlinn D, et al. *vegan*:  
528 Community Ecology Package. R package version 2.5-3 [Internet]. 2018. Available from:  
529 <https://cran.r-project.org/package=vegan>
- 530 45. Brown R, Hing CT, Fornace K, Ferguson HM. Evaluation of resting traps to examine the  
531 behaviour and ecology of mosquito vectors in an area of rapidly changing land use in Sabah,  
532 Malaysian Borneo. *Parasit Vectors.* 2018;11:346.
- 533 46. Burkett DA, Kelly R, Porter CH, Wirtz RA. Commercial mosquito trap and gravid trap  
534 oviposition media evaluation, Atlanta, Georgia. *J Am Mosq Control Assoc.* 2004;20:233—238.
- 535 47. Degener CM, Eiras ÁE, Ázara TMF, Roque RA, Rösner S, Codeço CT, et al. Evaluation of  
536 the Effectiveness of Mass Trapping With BG-Sentinel Traps for Dengue Vector Control: A  
537 Cluster Randomized Controlled Trial in Manaus, Brazil. *J Med Entomol.* 2014;51:408–20.
- 538 48. Eiras AE, Buhagiar TS, Ritchie SA. Development of the gravid *Aedes* trap for the capture of  
539 adult female container-exploiting mosquitoes (Diptera: Culicidae). *J Med Entomol.*  
540 2014;51:200–9.
- 541 49. Meeraus WH, Armistead JS, Arias JR. Field comparison of novel and gold standard traps for  
542 collecting *Aedes albopictus* in northern Virginia. *J Am Mosq Control Assoc.* 2008;24:244–8.

- 543 50. Ball TS, Ritchie SR. Sampling biases of the BG-Sentinel trap with respect to physiology,  
544 age, and body size of adult *Aedes aegypti* (Diptera: Culicidae). J Med Entomol. 2010;47:649–56.

545 **Figures**

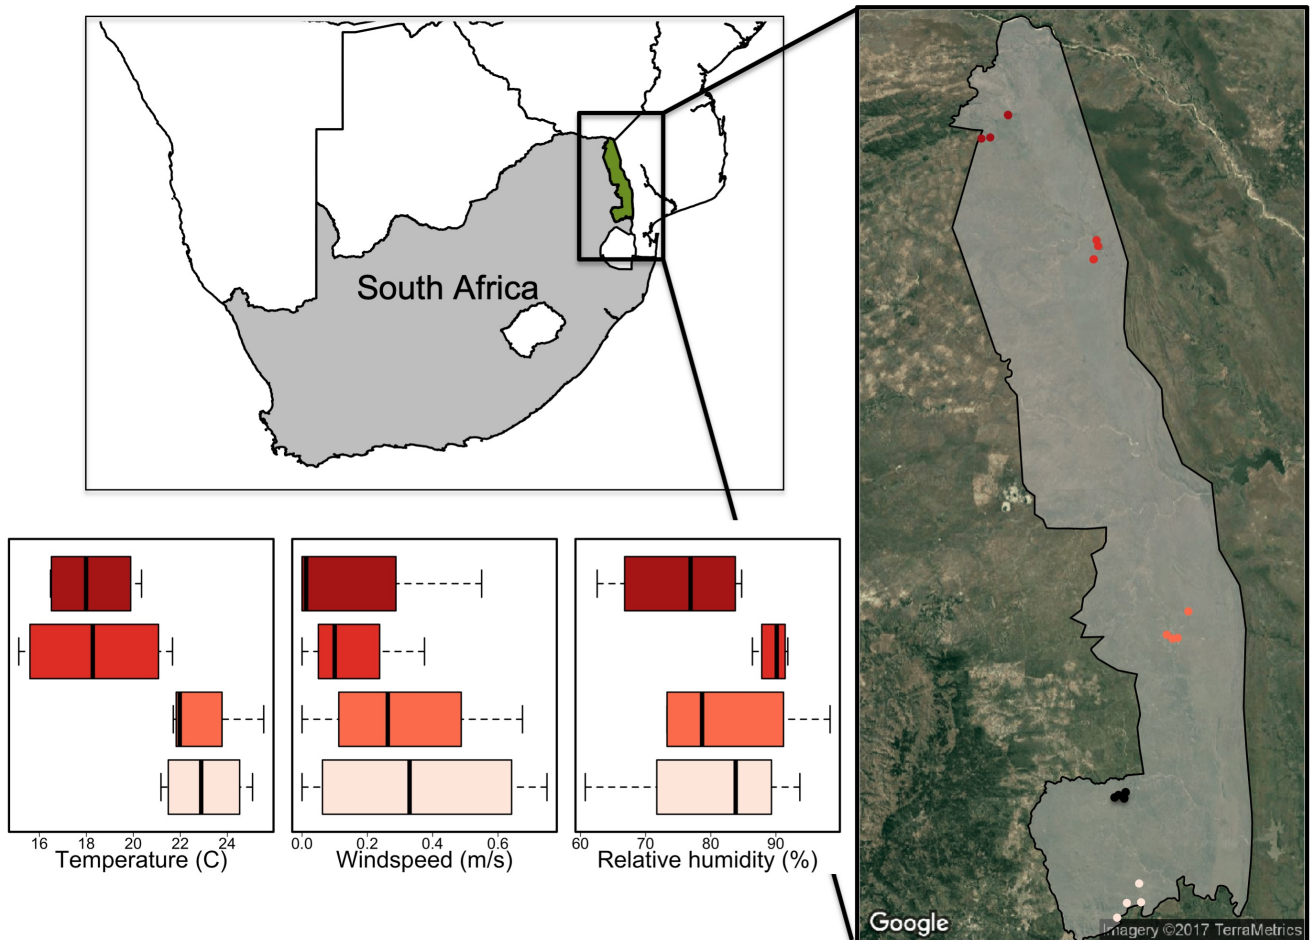

546

547 Fig 1. Map of the spatial locations and weather conditions of trapping sites within KNP.

548 Colors represents the five regions where trapping occurred. From south to north, these

549 include the Malelane, Skukuza (no weather data), Satara, Shingwedzi, and Punda Maria

550 sections. Each dot in the map represents a unique water body sampled. Regions of the park

551 were characterized by distinct weather patterns (Table S1).

552

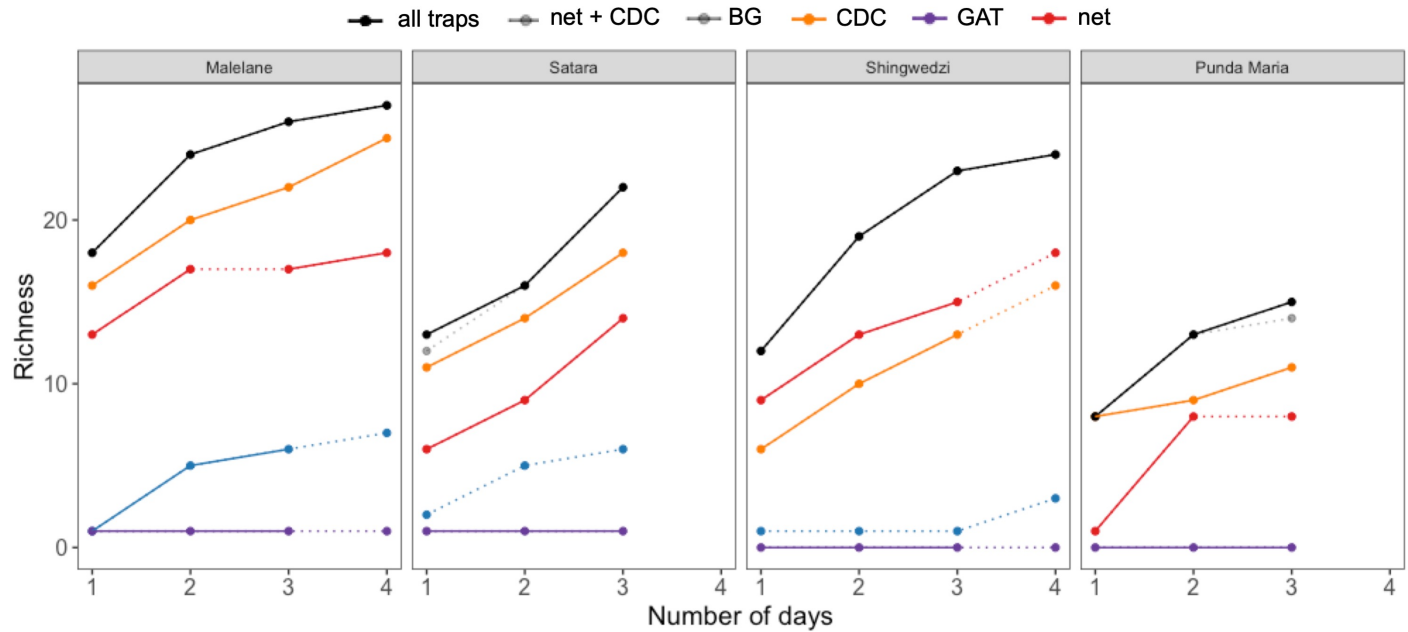

553

554 Fig 2. Richness (number of unique species) was sensitive to sampling effort and trap type.

555 Richness values in each region were aggregated across sites; figure S1 displays data for

556 each site within a region. Solid lines indicate that no traps were compromised at any site,

557 dashed lines indicate that one trapping site was not collected. Sites within the Satara and

558 Punda Maria region were only sampled for three nights due to rain.

559

560

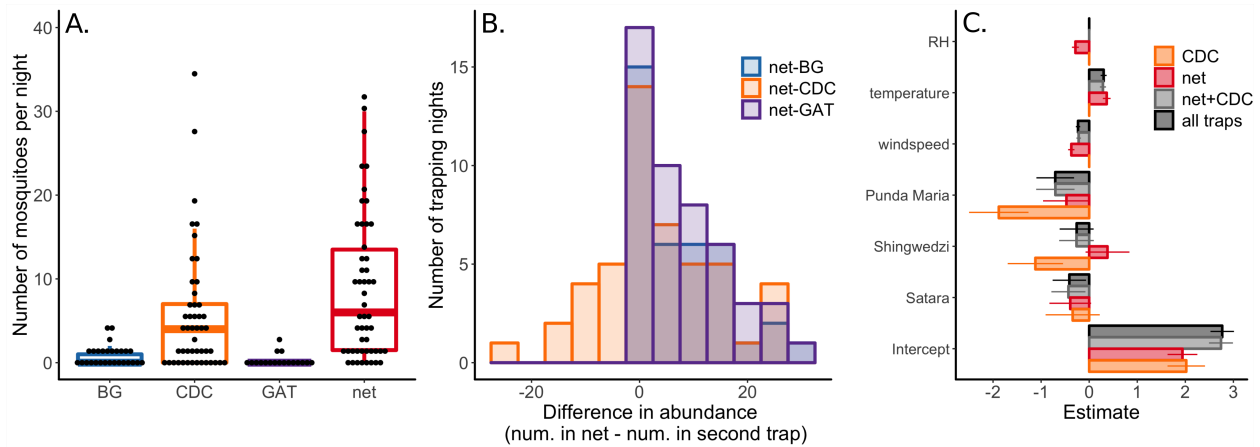

561

562 Fig 3. Mosquito abundance. (A) The number of mosquitoes captured by trap type; dots  
563 represent the number captured on each night at each site. (B) Histograms showing the  
564 difference in the number of mosquitoes sampled between trap types paired by sampling  
565 site. (C) Regression parameter estimates and standard errors from statistical models  
566 characterizing the median number of mosquitoes sampled at sites relative to Malelane and  
567 compared to the mean relative humidity (RH), temperature, or wind speed conditions.  
568 Colors indicate whether data used for model fitting was based on one trap or aggregated  
569 from multiple traps. Table S3 defines the parameter estimates and hypothesis tests.

570

571

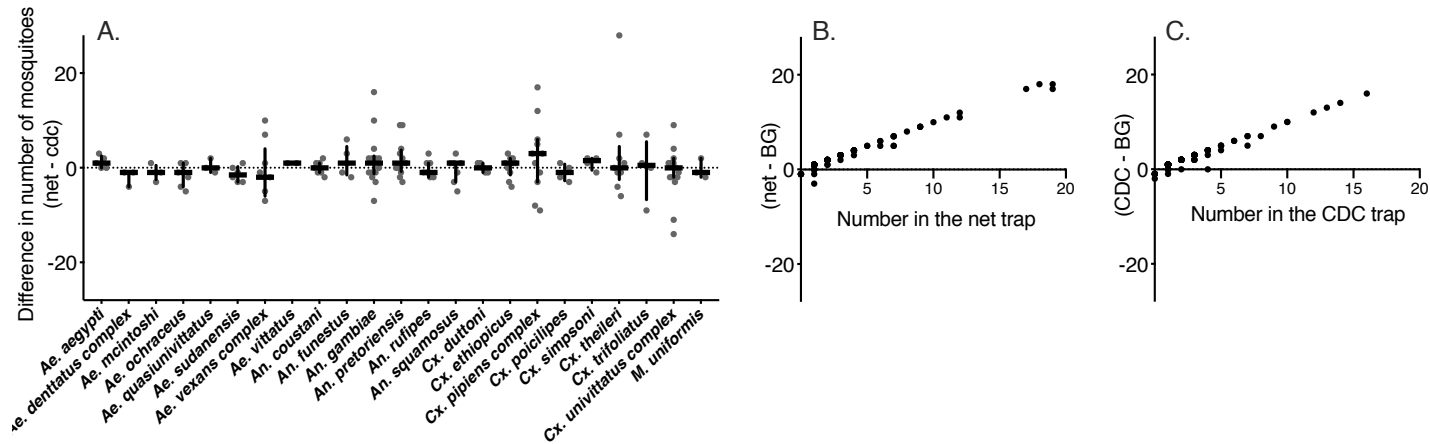

572

573 Fig 4. There were no species-specific differences between (A) the net vs. cdc trap, while  
574 species-specific differences between (B) the net vs. BG trap and the (C) CDC vs. BG trap  
575 were driven by overall abundance in the net or CDC trap. Dots represent the difference in  
576 the number of mosquitoes collected between pairs of traps based on the total number of  
577 mosquitoes sampled across nights at each site. (A) Lines represent the median and  
578 interquartile range of the data. Data displayed do not include sites where no individuals of  
579 a given species were collected in either trap, but results remain consistent regardless of  
580 whether these sites are or are not included. No hypothesis test for the individual species  
581 was significant (p-values = 0.181, 0.174, 0.345, 0.143, 1, 0.134, 0.476, 0.346, 1, 0.498, 0.360,  
582 0.152, 0.796, 0.931, 1, 0.719, 0.372, 0.423, 0.265, 0.725, 1, 0.850, 1). See Figure S3 for  
583 species-specific comparisons with the BG trap and Table S4 for a summary table for the BG  
584 trap.

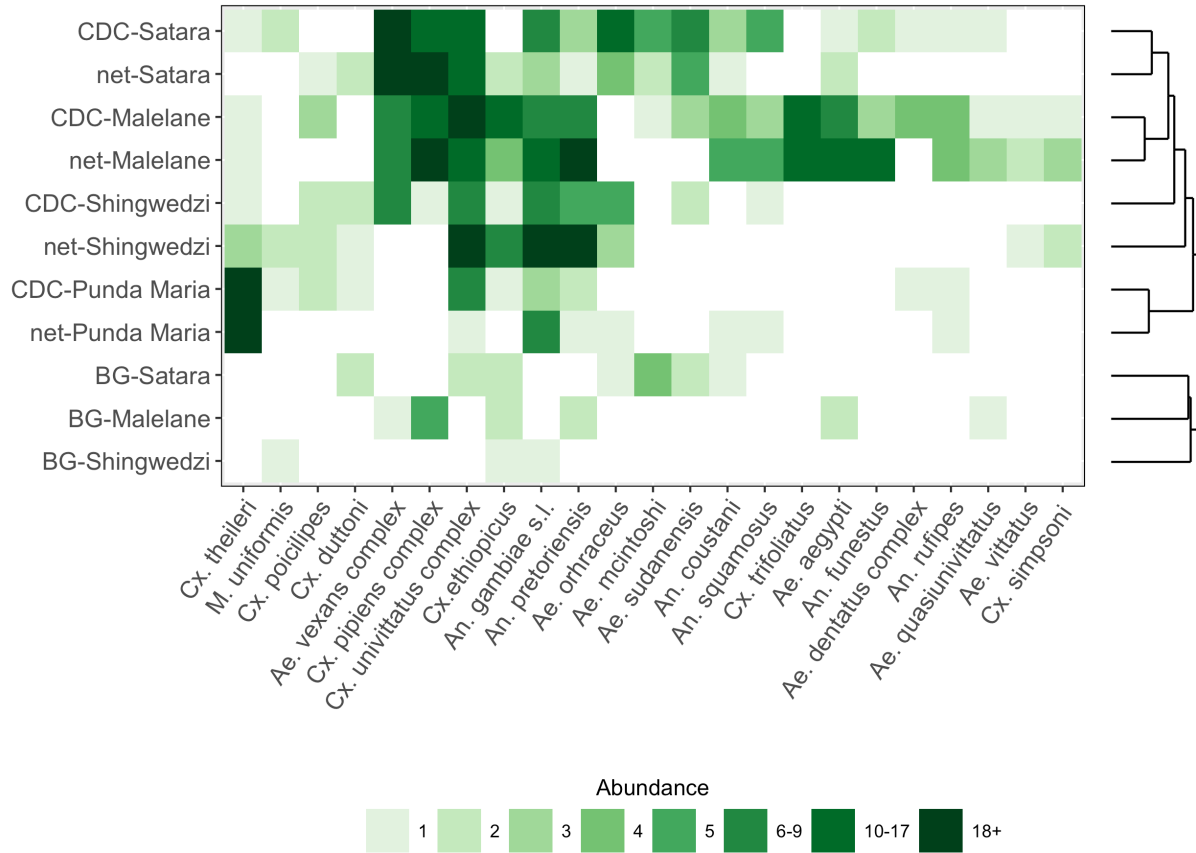

585

586 Figure 5. Communities collected in the net and CDC trap are clustered by region. Traps and  
587 regions are ordered according to the tree produced by clustering (Fig S5). Colors represent  
588 species abundance, with color bins defining the 30<sup>th</sup> to 90<sup>th</sup> percentile in increments of 10.

589

590

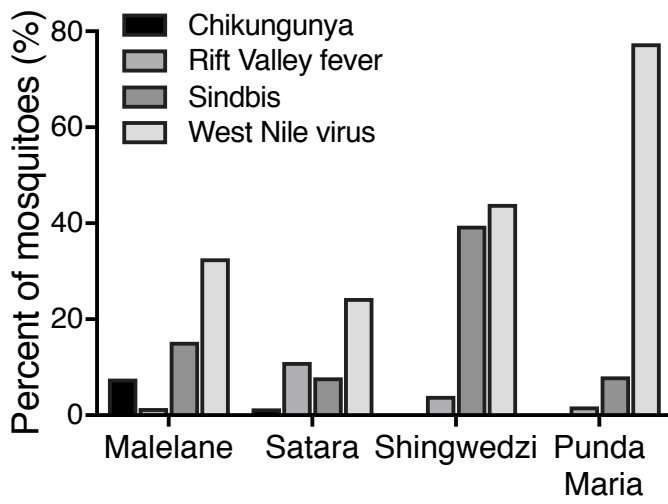

591

592 Fig 6. The percentage of mosquitoes identified as primary vectors in each region.

593
